# Supplementary material
Source: PubMed Central journal article supplement (PMC6224695)
Supplement: mmc2.pdf [file mmc2.pdf]

# Nanoscale Topography and Poroelastic Properties of Model Tissue Breast Gland Basement Membranes

Gloria Fabris,<sup>1,3</sup> Alessandro Lucantonio,<sup>2</sup> Nico Hampe,<sup>1</sup> Erik Noetzel,<sup>1</sup> Bernd Hoffmann,<sup>1</sup> Antonio DeSimone,<sup>2</sup> and Rudolf Merkel<sup>1,\*</sup>

<sup>1</sup>Institute of Complex Systems, ICS-7: Biomechanics, Forschungszentrum Jülich, Jülich, Germany; <sup>2</sup>International School for Advanced Studies—SISSA, Trieste, Italy; and <sup>3</sup>Department of Mechanical Engineering, Stevens Institute of Technology, Hoboken, New Jersey

**ABSTRACT** Basement membranes (BMs) are thin layers of condensed extracellular matrix proteins serving as permeability filters, cellular anchoring sites, and barriers against cancer cell invasion. It is believed that their biomechanical properties play a crucial role in determining cellular behavior and response, especially in mechanically active tissues like breast glands. Despite this, so far, relatively little attention has been dedicated to their analysis because of the difficulty of isolating and handling such thin layers of material. Here, we isolated BMs derived from MCF10A spheroids—three-dimensional breast gland model systems mimicking *in vitro* the most relevant phenotypic characteristics of human breast lobules—and characterized them by atomic force microscopy, enhanced resolution confocal microscopy, and scanning electron microscopy. By performing atomic force microscopy height-clamp experiments, we obtained force-relaxation curves that offered the first biomechanical data on isolated breast gland BMs to our knowledge. Based on enhanced resolution confocal microscopy and scanning electron microscopy imaging data, we modeled the system as a polymer network immersed in liquid and described it as a poroelastic material. Finite-element simulations matching the experimental force-relaxation curves allowed for the first quantification, to our knowledge, of the bulk and shear moduli of the membrane as well as its water permeability. These results represent a first step toward a deeper understanding of the mechanism of tensional homeostasis regulating mammary gland activity as well as its disruption during processes of membrane breaching and metastatic invasion.

## INTRODUCTION

Basement membranes (BMs) are thin sheets of condensed extracellular matrix (ECM) proteins secreted by epithelial, mesothelial, and endothelial tissues that separate them from underlying connective tissue (1). They are ubiquitously present in the body and provide a variety of functions (2): besides acting as cellular anchoring sites, they regulate cellular motility, influence tissue remodeling, and in some cases even act as highly selective permeability barriers (3,4). Their composition varies according to physiologic or pathologic conditions (5) and to tissue distribution, but their main components are collagen (typically, type IV), various laminin isoforms, nidogen, and perlecan. Typically, laminins start the process of BM assembly by binding to cell surface receptors, most prominently of the  $\beta 1$  integrin family. Subsequently, self-assembly of laminin and attrac-

tion to other BM components occur. Nidogens act as network stabilizers by bridging laminins and type IV collagen, which polymerizes, forming a covalently linked network (6,7). Perlecan and agrin then bind to nidogen, laminin, integrins, dystroglycan, and sulfated glycolipids, creating multiple collateral interactions whose exact molecular details are still the object of intense scrutiny (8).

In breast glands, BMs are fundamental components of epithelial tissue architecture and act as the first barrier against metastatic invasion (9); the process of membrane breaching initiated by invasive neoplasms is partly mediated by the secretion of BM-specific matrix metalloproteinases and further facilitated by the increased motility and proliferative potential of cancer cells (10). The alterations in tensional homeostasis caused by expanding tumor masses can in fact lead over time to a breakthrough of invasive cells into the neighboring connective tissue (11). To better comprehend the mechanisms of membrane breaching during cancer cell invasion, therefore, specific BMs' biophysical properties (such as thickness, stiffness, and permeability) ought to be characterized. Despite the high physiological relevance of

Submitted February 8, 2018, and accepted for publication September 10, 2018.

\*Correspondence: [r.merkel@fz-juelich.de](mailto:r.merkel@fz-juelich.de)

Editor: Cynthia Reinhart-King.

<https://doi.org/10.1016/j.bpj.2018.09.020>

© 2018 Biophysical Society.

breast gland BMs, however, no single study has tried to biomechanically characterize them yet because of the difficulty of handling such thin protein layers.

Here, BMs were investigated in a simplified environment with respect to the *in vivo* situation. We isolated and characterized BMs endogenously secreted by three-dimensional (3D) cellular spheroids (or acini) derived from the human breast epithelial cell line MCF10A (12). Such 3D cell cultures recapitulate, *in vitro*, the most relevant physiological features of breast gland acini *in vivo* and are therefore a unique platform to investigate the fundamental units of breast gland tissue in a biologically relevant and yet controlled context. Our previous work highlighted that the BM scaffolds of MCF10A spheroids develop gradually and can be categorized as low- (1–12 days in culture), semi- (13–24 days), and highly (more than 24 days) matured (4). In this work, BMs isolated from low- and highly matured acini were analyzed and compared.

Some BMs isolated from other types of tissues have already been the object of similar topographical and biomechanical studies: scanning electron microscopy (SEM) imaging, for instance, has been used to estimate the pore size of vascular endothelial BMs (13). Atomic force microscopy (AFM) imaging and indentation, on the other hand, have revealed that the thickness and elasticity of the retinal internal limiting membrane are age dependent (14), change dramatically according to hydration level (15), and display a side specificity (16,17) as a consequence of asymmetric protein organization. Analogous results have been reported for corneal BMs (18). The approach used so far to extract values of the Young's modulus from AFM indentation data (namely, the use of the Hertz model), however, assumes that the material analyzed is a homogeneous, half-infinite, and perfectly elastic space (19). Clearly, when indenting very thin layers of hydrated biopolymer networks immersed in water, this approximation cannot hold.

Here, based on the indications of the BM structure obtained from enhanced resolution confocal microscopy (LSM) and SEM imaging, we modeled the membrane as a polymer network immersed in liquid. We developed a large deformation poroelastic model that, by accounting for the finite thickness of the membrane, describes its mechanics under deep indentation and allows us to estimate both mechanical properties and water permeability of the BMs. In short, this study offers the first characterization, to our knowledge, of breast gland BMs in terms of topography, structure, and mechanical properties and brings us one step closer to a deeper understanding of epithelial tissue architecture and regulation under normal and pathological conditions.

## MATERIALS AND METHODS

### Cell culture

MCF10A cells (ATCC, Manassas, VA) were cultured in a humidified environment (5% CO<sub>2</sub>, 37°C) in Dulbecco's modified Eagle's medium/F12 growth medium (Life Technologies, Darmstadt, Germany) containing 5% horse serum (Life Technologies), 20 ng/mL epidermal growth factor

(Sigma-Aldrich, Steinheim, Germany), 0.5 µg/mL hydrocortisone (Sigma-Aldrich), 100 ng/mL cholera toxin (Sigma-Aldrich), 10 µg/mL insulin (Sigma-Aldrich), 100 U/mL penicillin (Life Technologies), and 100 µg/mL streptomycin (Sigma-Aldrich). MCF10A 3D acini were cultivated according to a protocol adapted from Debnath et al. (12) and described in (4). In short, single cells were seeded on a growth-factor-reduced Engelbreth-Holm-Swarm (EHS) gel bed (Geltrex; Life Technologies) and supplemented with Dulbecco's modified Eagle's medium/F12 assay medium containing 2% horse serum, 5 ng/mL epidermal growth factor (exclusively days 1–9), 0.5 µg/mL hydrocortisone, 100 ng/mL cholera toxin, 10 µg/mL insulin, 100 U/mL penicillin, 100 µg/mL streptomycin, and a low, nongelling concentration of Geltrex (2%), which was changed every third day.

### BM isolation

First, acini had to be isolated from the EHS matrix; to this end, samples were first washed with ice-cold phosphate-buffered saline (PBS, 5 min), then incubated in cell recovery solution (BD Bioscience, Fernwald, Germany) for 45 min at 4°C. Individual spheres were carefully pipetted out of the fluid gel matrix under a stereo microscope (Stemi 2000-CS; Carl Zeiss, Jena, Germany) and transferred into centrifuge tubes treated for minimizing protein binding (LoBind; Eppendorf, Wesseling-Berzdorf, Germany). After centrifugation (5 min, 0.1 RCF, 4°C) and elimination of the supernatant, a pellet of MCF10A acini could be resuspended and transferred on poly-L-lysine-coated glass (30 min, 37°C) for further staining and imaging or kept for BM isolation. For AFM and SEM characterization, two different isolation protocols were adopted depending on the acinar maturation stage. For MCF10A acini up to 12–15 days, after the isolation from the Geltrex matrix, it sufficed to perform one extra round of centrifugation at 16 RCF (4 min, 4°C). The acinar structures then literally broke apart, leaving thin BM fragments floating in the supernatant. These could then be carefully pipetted onto poly-L-lysine-coated glass coverslips (30 min, 37°C), where they would adhere firmly. For older spheres, centrifugation was not sufficient for isolating the BM. A manual setup for membrane isolation had to be established: this consisted of two self-produced bent glass microcapillaries that, being controlled via separate micromanipulators, could be employed to immobilize the MCF10A acinus on one end and break through it on the other end, effectively allowing a partial peeling off of BM fragments (see Fig. 1, *a–d*). For BM visualization, a collagen IV staining was performed before isolation (see Fig. 1, *b* and *d*). In both cases, after BM isolation, the samples were treated with a 1% solution of octyl-β-D-glucopyranoside detergent (Sigma-Aldrich) in PBS and subject to ultrasonic treatment (Sonorex RK-100; Bandelin, Berlin, Germany) for 15–20 min to eliminate cellular debris and lipid residues from the membranes.

### Immunocytochemistry and LSM

For immunocytochemistry of the BMs of native MCF10A acini, these were isolated from the EHS gel matrix as described above and transferred on poly-L-lysine treated glass coverslips. Unspecific antibody binding was blocked by incubation with 5% skim milk powder in PBS for 30 min at 37°C. The samples were not fixed to image BMs under native conditions. 1:200 solutions of primary antibodies binding to collagen IV (rabbit, ab6586; Abcam, Cambridge, United Kingdom); collagens I, II, and III (clone MMCHABC, mouse, MAB1334; Merck, Darmstadt, Germany); laminin-3A32 (γ-2 chain, clone D4B5, isotype IgG1, mouse, MAB 19562; Merck); and perlecan (anti-heparan sulfate proteoglycan antibody, clone A7L6, rat, MAB1948P; Merck) were incubated in dilution buffer (1% skim milk powder in PBS) for 2 h at 37°C. After a washing step in dilution buffer (5 min, room temperature [RT]), incubation with the secondary antibodies solution composed of 1:200 anti-rabbit IgG (Alexa-Fluor 405, A31556; ThermoFisher, Waltham, MA), 1:1000 goat anti-mouse

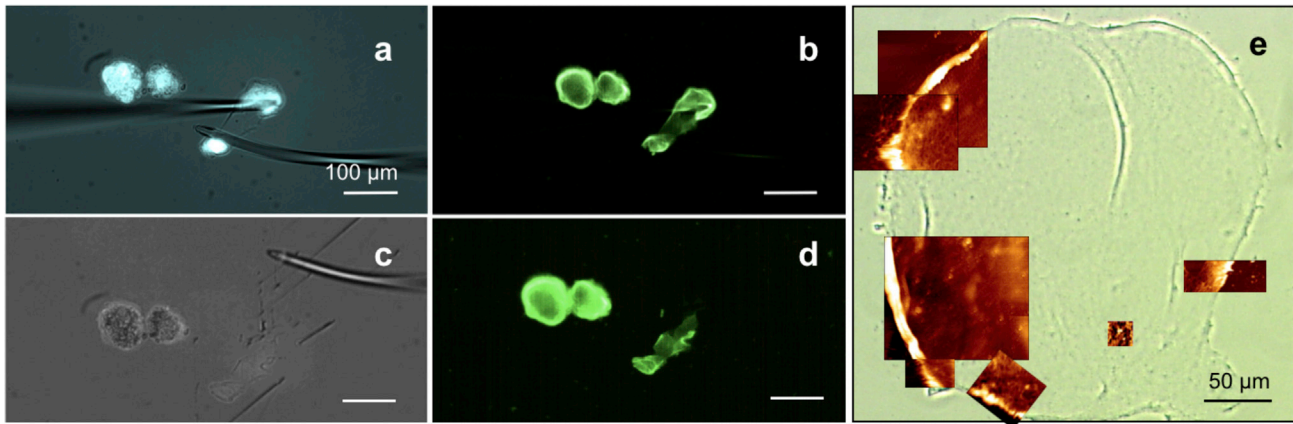

**FIGURE 1** (a) Isolation procedure for highly matured BMs. MCF10A spheres were isolated from the EHS matrix and transferred on a poly-L-lysine-treated petri dish, then the membrane was peeled off, breaking the spheres apart with bent microcapillaries. (a) CellTracker cytoplasmic staining is shown in cyan. (b) Collagen IV staining is shown in green. (c) A phase-contrast image of the isolated BM fragments and (d) corresponding collagen IV staining. Only parts of the membrane lying flat and not folded on the surface were used for AFM imaging. (e) A phase-contrast light microscopy image of a low-matured isolated BM in ultrapure water. Overlapping AFM topographical images recorded in contact mode are shown in brown.

IgM (Alexa Fluor 488, A21042; ThermoFisher), 1:200 anti-mouse IgG1 (Alexa-Fluor 647, A21240; ThermoFisher), and 1:200 anti-rat (eFluor 570, 41-4321-82; eBioscience, Darmstadt, Germany) antibodies in dilution buffer followed (45 min, 37°C). After gentle aspiration of the solution and a washing step in PBS (5 min, RT), the sample was embedded in Fluoro-Mount (Sigma-Aldrich) to be analyzed. Confocal microscopy was performed using an LSM 880 with Airyscan detector (Carl Zeiss) allowing for lateral resolutions down to 130 nm. In this setup, the complete Airy disk is imaged on a concentrically arranged array of hexagonal detectors consisting of 32 elements of 0.2 AU each. During acquisition, the pinhole remains open, hence maximizing signal collection. Image reconstruction with improved resolution is obtained via pixel reassignment of the signals from all detector elements to their correct position and partial deconvolution (20).

### Collagen IV pore size and filament thickness determination

For determining collagen IV pore sizes, fluorescent images were filtered using a two-dimensional Gaussian filter with SD of 0.5 pixels. Then, the image background was identified by morphological opening using a disk-shaped structuring element with a radius of five pixels (pixel size: 0.042  $\mu\text{m}$ ). In the next step, the background image was subtracted from the smoothed image and the result was again smoothed with a Gaussian filter of SD value of three pixels. After contrast enhancement, the image was segmented using half of its mean gray value as a threshold. Everything below the threshold was consequently labeled as “hole.” At least  $n = 10$  images of different BMs were analyzed for each population. For determining collagen filaments’ thickness, fluorescent images were preprocessed with the same procedure used in the pore-size-finding algorithm. After contrast enhancement and image segmentation, everything above the threshold was labeled as “filament.” Filaments with less than 100 pixels were rejected (pixel size: 0.042  $\mu\text{m}$ ). Then, the distance of each pixel belonging to the skeletonized filament mask to the nearest black pixel was calculated, thus identifying the local filament radius. Again, at least  $n = 10$  images of different BMs were analyzed for each population.

### AFM

All AFM measurements were performed using a Nanowizard Life Science version instrument (JPK, Berlin, Germany) equipped with an inverted opti-

cal microscope (Axiovert 200; Carl Zeiss) for sample observation. For imaging, pyramidal silicon nitride tips with nominal spring constant  $k = 0.06$  N/m and resonance frequency  $f = 18$  kHz (DNP-10 D; Bruker, Leiderdorp, The Netherlands) were used in contact mode. Typical scan areas ranged from  $15 \times 15 \mu\text{m}^2$  to  $50 \times 50 \mu\text{m}^2$  (see Fig. 1 e). For force-relaxation experiments, tips with indenters of two different radii were used: a silicon tip having a nominal  $k = 0.2$  N/m and  $f = 13$  kHz and terminating in a spherical indenter of  $R = 500$  nm (B500-CONTR; Nanotools, Munich, Germany) and a silicon tipless cantilever of nominal  $k = 0.04$  N/m and  $f = 7$  kHz (Arrow TL1Au with Ti/Au back tip coating; Nanoworld, Neuchatel, Switzerland) modified by the attachment of an  $R = 3.5 \mu\text{m}$  silica bead (PSI-5.0, surface plain; G. Kisker GbR, Steinfurt, Germany) via two-component glue (plus Endfest 300; UHU, Buehl Baden, Germany). For each BM, force-relaxation data were typically recorded on an  $8 \times 8$  grid of positions and repeated, varying the force setpoint for both indenters. Data were averaged over a subset of the grid (after removing curves affected by instrument drift, instability, or similar artifacts) to account for local structural heterogeneities. All tips were individually calibrated via the thermal noise method (21). The cantilever speed was held at  $v = 5 \mu\text{m/s}$ , and the force setpoint varied from 0.1 to 1 nN.

### SEM

For SEM experiments, isolated BMs on glass coverslips were additionally washed in a 0.5% solution of Triton-X-100 (Sigma-Aldrich) in PBS (5 min, RT) before ultrasonic treatment in PBS (10 min, RT). After dehydration in a graded series of HPLC-grade ethanol in ultrapure water (10, 30, 50, 70, 90, 95 (3 $\times$ ), 100%, 5 min, RT) and critical point drying in  $\text{CO}_2$  (CPD 030; Bal-Tec, Balzers, Liechtenstein), a 2 nm coating of platinum and palladium was sputtered on the samples using a 208 HR sputter coater (Cressington, Watford, UK) with an MTM-20 thickness controller unit. Imaging was performed on a Gemini 500 scanning electron microscope (Carl Zeiss) using an acceleration voltage between 3 and 10 kV at magnifications ranging from 8500 $\times$  to 265,000 $\times$ .

### Computational modeling of the indentation experiments

Finite-element (FE) simulations of the indentation experiments were performed using a large-deformation poroelastic model (22) to characterize the coupled elasticity and fluid transport of the BMs. In such a model, the

state of the membrane is described by the displacement field  $\mathbf{u}$  of the polymer network with respect to the reference configuration and the solvent concentration  $c$  per unit reference volume. The chemical potential  $\mu$  of the solvent (here, water) within the membrane quantifies the energy carried by the solvent and its gradient represents the driving force of solvent migration. We will use the symbol  $\mathbf{F} = \mathbf{I} + \nabla \mathbf{u}$  (with  $\mathbf{I}$  the identity) for the deformation gradient and write  $J = \det \mathbf{F}$  for its determinant. Swelling processes are governed by the equations of balance of forces and moments that, assuming inertia is negligible, read as follows:

$$\operatorname{div} \mathbf{S} = 0, \quad \operatorname{skw} \mathbf{S}\mathbf{F}^T = 0, \quad (1)$$

where  $\mathbf{S}$  denotes the first Piola-Kirchhoff stress tensor. By the balance of solvent mass,

$$\dot{c} = \operatorname{div} \left( \frac{cD}{\mathcal{R}T} \nabla \mu \right), \quad (2)$$

where  $D$  is the water diffusivity,  $c$  the concentration of water per unit volume of the undeformed membrane,  $\mathcal{R}$  the universal gas constant, and  $T$  the absolute temperature. Here, a Darcy-like law was employed to relate the solvent flux to the gradient of solvent chemical potential because the polymer matrix and the solvent are considered to be separately incompressible; hence, the change in volume of the membrane is related to the change in solvent concentration with respect to its initial value  $c_o$ :

$$J = 1 + \mathcal{Q}(c - c_o). \quad (3)$$

This constraint is enforced through the Lagrange multiplier  $p$ . As concerns the constitutive equations, we prescribe the following Flory-Rehner representation for the free-energy density of the membrane (23,24):

$$\psi(\mathbf{F}, c) = \psi_e(\mathbf{F}) + \psi_m(c), \quad (4)$$

where  $\psi_e(\mathbf{F})$  and  $\psi_m(c)$  are the neo-Hookean elastic energy of the polymer network and the Flory-Huggins free energy of solvent-polymer mixing, respectively. The parameters of the free-energy density are the shear modulus  $G_d$  of the dry polymer, the polymer-solvent mixing parameter  $\chi$ , and the absolute temperature  $T$  of the environment. Consistency with thermodynamical principles provides the constitutive equations for  $\mathbf{S}$  and  $\mu$  as the derivatives of the free energy with respect to  $\mathbf{F}$  and  $c$ , respectively (with the additional reactive terms depending on the Lagrange multiplier  $p$ ). By linearizing the constitutive equations for the stress about the initial configuration, the incremental shear  $G$  and bulk  $K$  moduli of the membrane can be computed as (25)

$$G = \frac{G_d}{J_o^{1/3}}, \quad K = -\frac{G}{3} + \frac{\mathcal{R}T}{\mathcal{Q}} \left( \frac{1}{\phi_o} - 2\chi \right) (1 - \phi_o)^2, \quad (5)$$

where  $\phi_o = 1 - 1/J_o$  is the initial volume fraction of water (undented condition), which is related to the initial water concentration:  $c_o = (J_o - 1)/(\mathcal{Q}J_o)$ . In the reference configuration, because the membrane is stress-free and in contact with water in equilibrium with its vapor, the following mechanochemical equilibrium condition (25) holds:

$$\frac{\mathcal{R}T}{\mathcal{Q}} [\log \phi_o + 1 - \phi_o + \chi(1 - \phi_o)^2] + G = 0. \quad (6)$$

In particular, once  $\phi_o$  and  $\chi$  are known, the incremental shear modulus  $G$  can be readily computed from Eq. 6. Hence, the model depends on three independent poroelastic material parameters:  $D$  and two others among those appearing in Eqs. 5 and 6, namely  $\phi_o$ ,  $\chi$ ,  $G$ ,  $G_d$ , and  $K$ . The poroelastic parameters were fitted numerically for each membrane to reproduce the experimental force-relaxation curves obtained using indenters of radius

$R = 3.5 \mu\text{m}$  and  $R = 0.5 \mu\text{m}$  for the AFM force setpoints  $F_{\max} = 1 \text{ nN}$  and  $F_{\max} = 0.5 \text{ nN}$ , respectively. Specifically, the gradient-free BOBYQA (bound optimization by quadratic approximation) optimization algorithm (26) was employed to perform a least-square fitting of the experimental data. For symmetry reasons, one-fourth of each membrane was chosen as the computational domain. It was numerically verified that, because of the high ratio between the in-plane dimensions and the thickness measured in the experiments, the membranes behave mechanically as solids with infinite planar extension so that the specific geometry of the boundary is irrelevant. Thus, each membrane was modeled as a parallelepiped with a sufficiently high aspect ratio (100) and a thickness set to the individual average value measured experimentally via AFM imaging. The substrate was assumed to be rigid, frictionless, and impermeable. Apart from the boundaries in contact with the substrate and the indenter, the free surface of the membrane was assumed to be in chemical equilibrium with the surrounding water bath at all times, a condition that amounts to prescribing a null chemical potential (i.e., pure water in equilibrium with its own vapor) on the wet surface. A penalty formulation was employed to describe frictionless contact between the membrane and the spherical indenter, which was modeled as a rigid body. The time history of the indenter displacement was prescribed according to the experiments. Detailed information on the computational model and the numerical procedures, including a table of the parameter values used in the simulations, can be found in the [Supporting Materials and Methods](#), and [Table S1](#).

## RESULTS

### AFM topographic characterization shows variations in BM thickness during membrane maturation and dehydration

To characterize the topography and thickness of BMs during the various maturation stages, BMs were isolated from low- and highly matured MCF10A acini and assessed by means of AFM contact imaging in ultrapure water. As expected for such a complex biological material, a certain level of heterogeneity was observed among the samples. For low-matured spheres (day 6–12), 27 images recorded from 17 different membranes were analyzed to obtain histograms of pixel heights; given the increased difficulty of isolating highly developed BMs, for highly matured ones, only six images from three different membranes (day 28–31) could be obtained. Despite the relatively low number of samples analyzed, a clear difference could be measured between the thickness of membranes at different stages of maturation (see [Fig. 2 f](#)). Single height histograms could always be fitted by Gaussian distributions, and, averaging over the distribution centers  $x_c$ , mean thickness values of 230 nm (with SD 95 nm) and 660 nm (SD 265 nm) were obtained for low- and highly matured BMs, respectively. This trend is well in line with data reported for other BMs (15) and reveals a thickening of the BM caused by endogenous protein secretion, as confirmed by immunostainings performed with anti-human laminin-3A32 antibodies.

Upon sample dehydration, a 10-fold decrease in membrane thickness was observed (see [Fig. 2 e](#)), with mean thickness values as low as 22 nm ( $n = 10$ , SD 6 nm). This result underlines the crucial role played by water in conferring BMs their native structure and confirms the necessity of

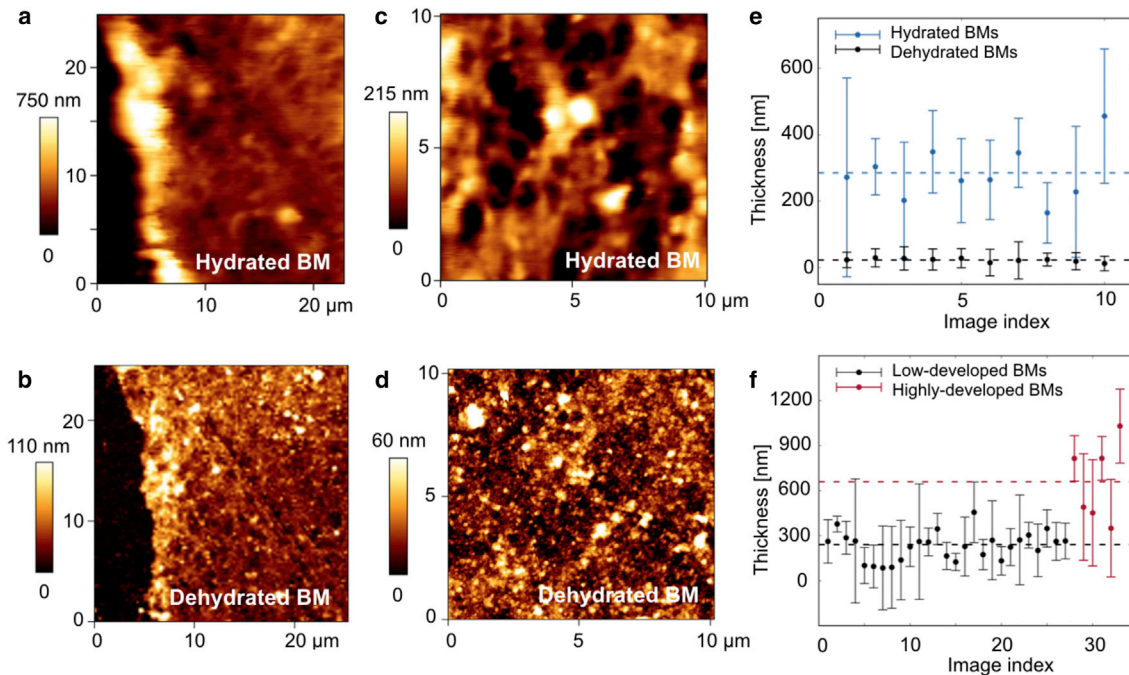

FIGURE 2 (a) Representative contact-mode imaging of a portion of BM isolated from a low-matured (day 12) BM in ultrapure water and (b) imaging of the same portion in air, after dehydration. The black background is the glass coverslip. (c) The surface topography of an inner portion of a hydrated and (d) dehydrated BM, respectively. (e) The decrease in mean BM thickness of low-matured membranes after dehydration and (f) age-dependent increase in BM thickness between low- and highly matured MCF10A acini. The distributions represent mean and full width at half-maximum of the Gaussian distributions used for fitting the height histograms of single AFM images. The horizontal dotted lines represent average values of the distributions' centers.

not merely modeling this material as an elastic solid but rather as a hydrated matrix immersed in fluid.

### LSM enhanced resolution imaging of main BM components show collagen-IV- dependent architecture

Immunostainings of the main components of breast gland BMs were performed on whole MCF10A acini of different maturation states isolated from the EHS gel and transferred on glass coverslips. LSM with Airyscan detector was used to image collagen type IV, laminin-3A32, the proteoglycan perlecan, and collagens types I, II, and III within the BM.

The stainings revealed a clear structure in protein architecture (see Fig. 3). A principal network composed of collagen IV was observed in BMs at all developmental stages. This was organized in the typical meshwork configuration ascribed to nonfibrillar collagens (27) and had a variable pore size spanning from  $\sim 50 \text{ nm}^2$  up to almost  $1 \mu\text{m}^2$  (see Figs. 3, a and g and 4. f). No significant difference could be observed in the pore diameter distribution between low-matured and highly matured BMs (see Fig. 4. f); similarly, the visible collagen filament thickness also remained essentially unchanged during BM development, with an average filament radius of  $\sim 200 \text{ nm}$  (see Fig. 4. c). With the caveat that the resolution limit of Airyscan microscopy (in this case,  $\sim 30\%$  of the excitation wavelength) prevented

us from observing molecular structures, this implies an early organization of collagen IV into its final structural arrangement.

Laminin-3A32, on the other hand, does not form a covalently linked independent network (28) but was arranged in a denser structure of smaller characteristic size that interconnected with the collagen IV meshwork, often partially filling its pores (see Fig. 3 i). Even after optimization of the filter settings to prevent bleedthrough, the perlecan signal was practically indistinguishable from that of laminin-3A32, indicating a high degree of colocalization between the two proteins for membranes of both age groups (see Fig. 3 e). The absence of interstitial collagens was confirmed by immunostainings recognizing specifically collagens of types I, II, and III (see Fig. 3 d).

### SEM images reveal two levels of protein organization

For further BM ultrastructure characterization, isolated membranes were observed via SEM (see Fig. 5). This time, because of the difficulty of isolating highly matured BMs, only membranes from the low-matured group (day 6–12) were analyzed. Despite critical point drying, after SEM preparation, numerous fractures and holes appeared on the membranes, indicating damage to the finer protein structures composing the BM. This inconvenience,

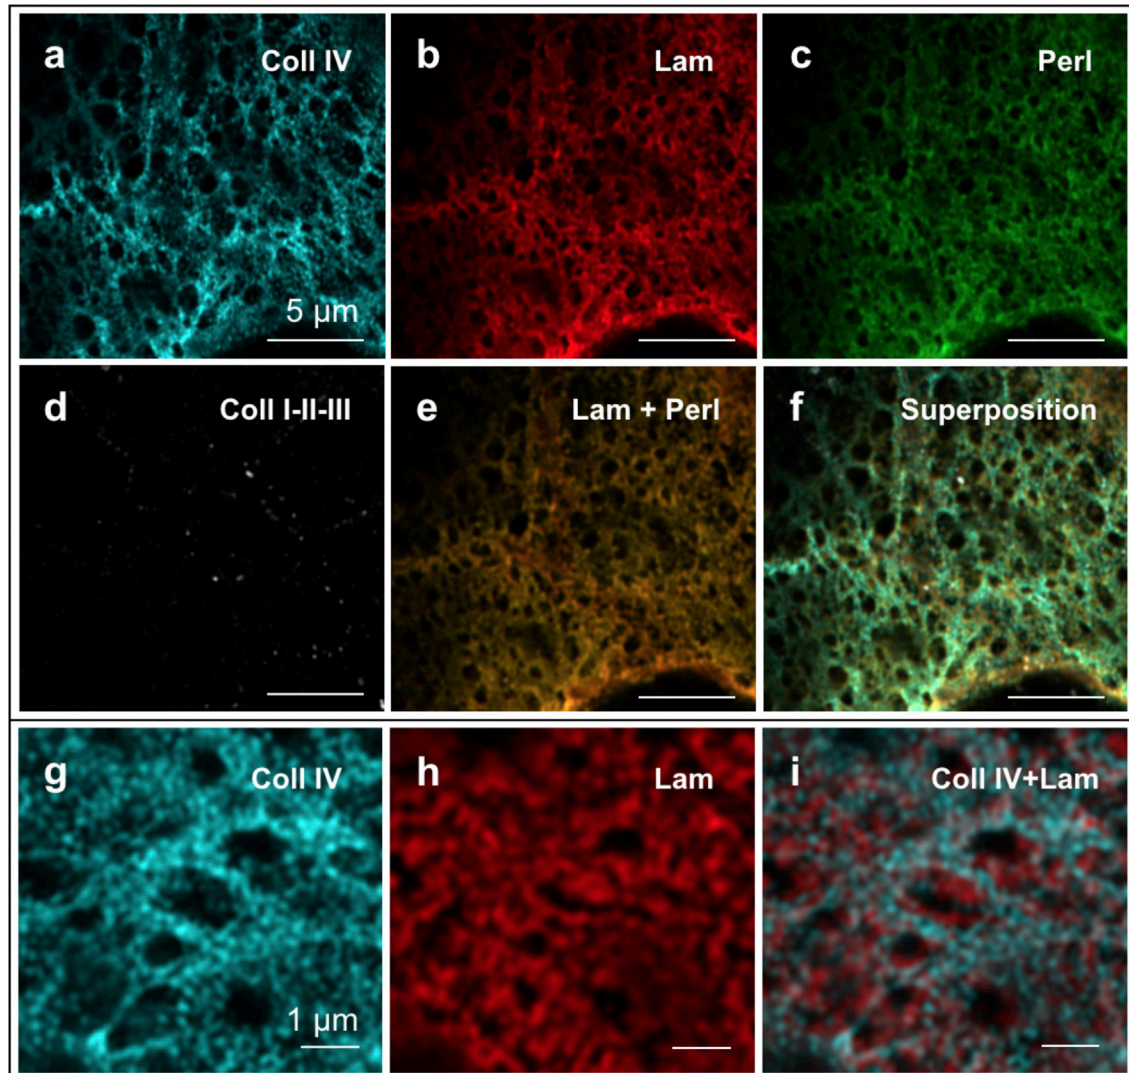

FIGURE 3 Immunocytochemical stainings of (a) type IV collagen, (b) laminin-3A32, (c) perlecan, and (d) interstitial collagens (types I, II, and III). (e) Colocalization of laminin-3A32 and perlecan signals (b and c). (f) A merged image of (a)–(d). Zooming in on (g) the collagen IV rings and (h) the laminin-3A32 structure, it becomes apparent how these create two intertwined meshworks of different characteristic pore size. (i) Merged signals (g + h). Scale bars, 5  $\mu\text{m}$  (a–f), 1  $\mu\text{m}$  (g–i).

though, allowed us to identify a “backbone” that remained intact in all samples (see Fig. 5 b). This appeared as a meshwork of thick protein bundles arranged in a honeycomb-like structure with a characteristic size of  $\sim 1 \mu\text{m}$  in diameter. Even accounting for a shrinking of  $\sim 20\%$  in the volume of biological samples treated for SEM preparation, this mesh size is very well in line with the one observed for the collagen IV pores in the LSM images. Within this polymer network, a finer meshwork of thin fibers could be observed (see Fig. 5 c). Even though SEM data does not allow for discrimination between different structural components of the BM, the high resolution of the images gives us a clear idea of the two-level organization of breast gland BMs.

### BM mechanical properties characterized by AFM showed behavior typical of poroelastic materials

To probe the mechanical and permeation properties of breast gland BMs, AFM indentations in height-clamp mode using two different spherical indenters (of radius  $R = 0.5 \mu\text{m}$  and  $R = 3.5 \mu\text{m}$ , respectively) were performed on low-matured BMs ( $n = 5$ ) isolated from MCF10A acini. A typical experimental indentation force curve is shown in Fig. 6 a. For each BM, force-relaxation data were typically recorded on an  $8 \times 8$  grid of positions and repeated, varying the force setpoint for both indenters. Data were averaged over a subset of the grid (after removing outliers, i.e., curves affected by excessive drift or obvious instabilities) to account for local structural heterogeneities.

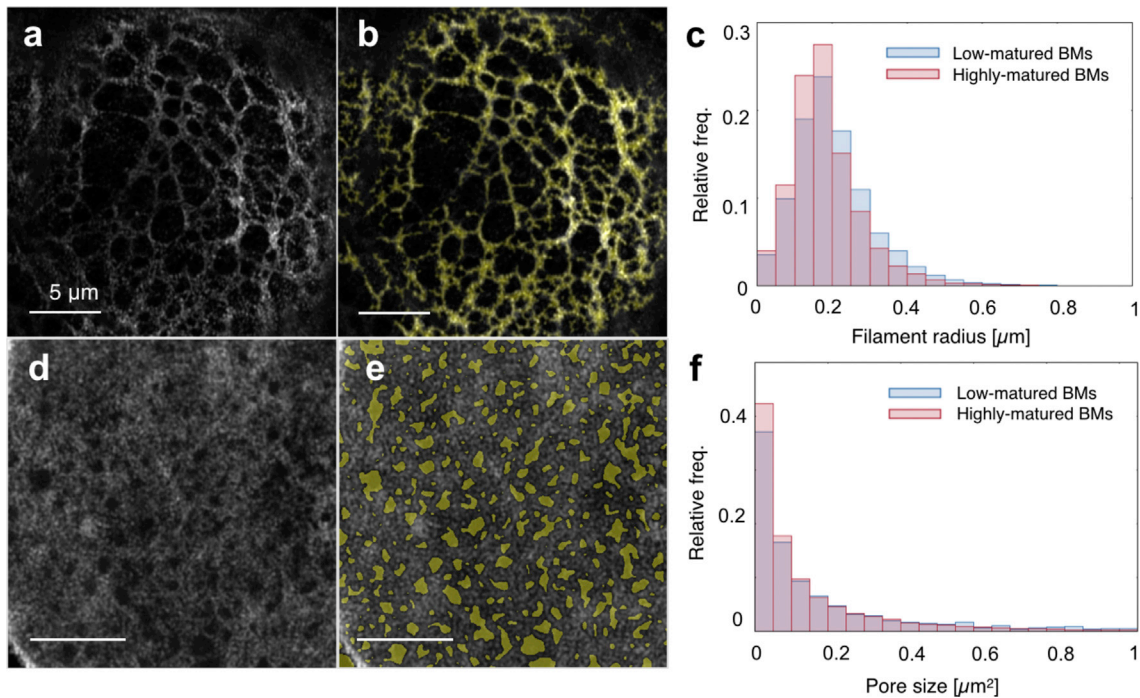

FIGURE 4 (a) Airyscan fluorescent image of the collagen IV network. (b) The filament mask. (c) The distribution of filament radii for low- and highly-matured BMs as determined from the masks. (d) An Airyscan fluorescent image of the collagen IV network. (e) The pores mask. (f) Corresponding pore size distributions. Scale bars, 5  $\mu\text{m}$ .

To rationalize the observed force relaxation and extract the material properties of the membranes, FE simulations of the indentation tests were performed using a poroelastic model for the BM as described in the [Materials and Methods](#). The computational domain depicted in [Fig. 6 b](#) was set using information on the thickness from AFM imaging for each membrane analyzed. As reported in [Fig. 6 c](#), indentation induces a localized solvent overpressure within the membrane on the order of 1.5 kPa, which drives fluid away from the indented region. The following solvent leakage from the free surface of the membrane relieves this overpressure and causes a reduction in the indentation force until a new chemomechanical equilibrium is attained

at the force plateau. This behavior is typically found in indentation tests of poroelastic materials (29,30). Upon fitting the material parameters for each membrane to the data sets corresponding to  $F = 1 \text{ nN}$ ,  $R = 3.5 \mu\text{m}$  and  $F = 0.5 \text{ nN}$ ,  $R = 0.5 \mu\text{m}$ , the model captures quantitatively the measured average force-relaxation curves ([Fig. 6 d](#)). The poroelastic properties of the membranes resulting from the fitting procedure are summarized in [Table 1](#). We remark that the values of the shear and bulk moduli refer to the free-swelling equilibrium, i.e., the undeformed membrane, and vary, for instance, with the hydration level (25).

To validate the model, the force-relaxation curve for  $F = 0.5 \text{ nN}$ ,  $R = 3.5 \mu\text{m}$  was simulated for each membrane using

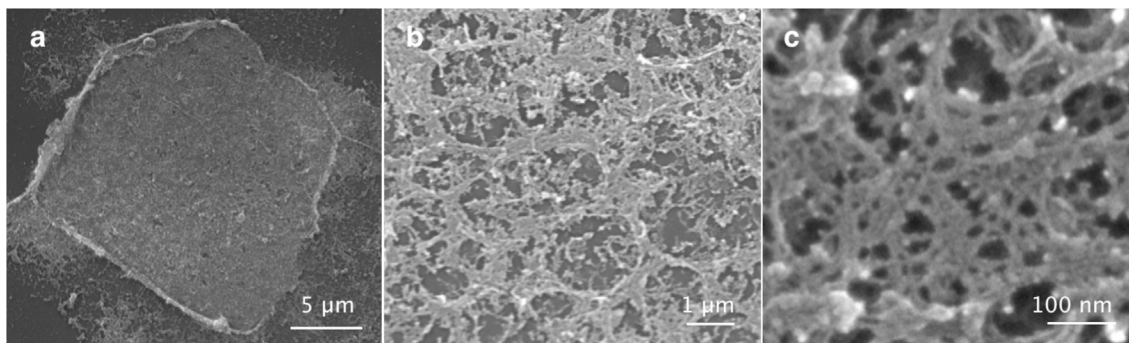

FIGURE 5 (a) SEM micrograph displaying the overview of a low-matured (day 8) isolated BM lying flat on the substrate. Despite the many fractures present in the BM as a consequence of sample preparation, in (b), a series of regular, ring-like bundles of fibers constituting the backbone of the BM can be identified, whereas (c) shows zoom-ins on the finer protein structure composing the BM meshwork.

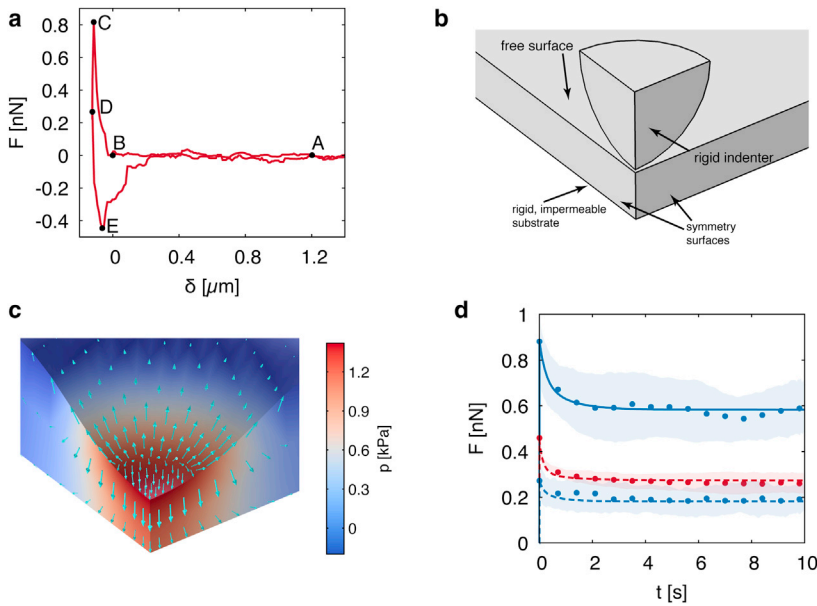

1 nN (solid lines), 0.5 nN (dashed lines). Dots and shaded areas correspond to the spatial averages (i.e., averages over all measured positions for a certain BM) and the SDs of the indentation force as computed from experimental data, respectively.

the parameter values fitted to reproduce the ( $F = 1$  nN,  $R = 3.5$   $\mu\text{m}$ ) curve. For the given indenter size, the model captures the poroelastic dynamics for both force setpoints, which correspond to different maximal indentation depths (Fig. 6 d). Additional comparison between experiments and simulations is reported in Fig. S1.

Finally, to assess the physiological relevance of poroelastic flow, we performed a simulation to estimate the solvent flux through the BM under a compressive load along the thickness direction. The load was chosen to have a peak amplitude of 500 Pa and a periodicity of 1 Hz (see Fig. S3). Such forces occur, e.g., during physical exercise (31), and even higher pressures have been recorded during milk ejection (32,33). The relative volume change experienced by the membrane in this case reached values of 22%, indicating that the fluid exchange due to realistic loads is substantial and likely to influence transport of all biomolecules throughout the BM.

## DISCUSSION

### Age-dependent changes and permeation

Upon BM dehydration, a 10-fold decrease in BM thickness was observed in all the membranes analyzed. This result is well in line with previously published findings for the internal limiting membrane (15) and can probably be explained by the high quantity of water-retaining heparan sulfate proteoglycans physiologically present in BMs. Although we cannot exclude that other BMs might react slightly differently to dehydration because of their different protein content, we can safely assume that water constitutes a fundamental component of BM architecture. Hence, any model of the mechanical material properties of BMs should—at least implicitly—incorporate the role of water. Here, we modeled the acinar BM as a hyperelastic matrix immersed in fluid.

**TABLE 1** Values of the Shear Modulus  $G$ , Bulk Modulus  $K$ , Solvent-Polymer Matrix Mixing Parameter  $\chi$ , and Water Diffusivity  $D$  of the BMs as Obtained from the Numerical Fitting Procedure for Two Values of the Indenter and Force Setpoints, Respectively

| BM # | $G$ (Pa)                |                         | $K$ (Pa)                |                         | $\chi$ (-)              |                         | $D$ ( $\times 10^{-7}$ m <sup>2</sup> /s) |                         |
|------|-------------------------|-------------------------|-------------------------|-------------------------|-------------------------|-------------------------|-------------------------------------------|-------------------------|
|      | $R = 0.5$ $\mu\text{m}$ | $R = 3.5$ $\mu\text{m}$ | $R = 0.5$ $\mu\text{m}$ | $R = 3.5$ $\mu\text{m}$ | $R = 0.5$ $\mu\text{m}$ | $R = 3.5$ $\mu\text{m}$ | $R = 0.5$ $\mu\text{m}$                   | $R = 3.5$ $\mu\text{m}$ |
| 1    | 1856                    | 540                     | 1125                    | 357                     | 0.42                    | 0.48                    | 0.02                                      | 0.30                    |
| 2    | 804                     | 192                     | 1476                    | 473                     | 0.44                    | 0.48                    | 0.03                                      | 1.50                    |
| 3    | 1045                    | 305                     | 1395                    | 435                     | 0.42                    | 0.47                    | 0.02                                      | 0.18                    |
| 4    | 558                     | 229                     | 1558                    | 461                     | 0.45                    | 0.48                    | 0.09                                      | 1.18                    |
| 5    | 862                     | ND <sup>a</sup>         | 1456                    | ND                      | 0.42                    | ND                      | 0.01                                      | ND                      |
| Mean | 1025                    | 316                     | 1402                    | 431                     | 0.43                    | 0.48                    | 0.03                                      | 0.79                    |
| SD   | 496                     | 156                     | 165                     | 52                      | 0.01                    | 0.01                    | 0.03                                      | 0.65                    |

Partial data is available for BM 5 because of the limited thickness of the membrane, which prevented indentation at the highest force setpoint.

<sup>a</sup>ND, no data.



To assess the porous nature of the *in vitro* grown BMs, we performed immunostainings of what are believed to be the most important breast BM components, namely, collagen IV and laminin-3A32. Despite the fact that the collagen IV network does not significantly alter its characteristic pore size with maturation, previous experiments had highlighted a clear variation in the permeability properties of BMs over time: fluorescently labeled 40 kDa dextran molecules diffuse freely through low-matured BMs, but their permeation through highly developed BMs displays a retardation effect that allowed us to estimate a pore size of at least 9 nm (4). These observations, consistent with the notion of membrane thickening over time, indicate that the fine protein meshwork filling the larger collagen IV pores must become denser during acinar development. The very high values of water diffusivity reported here (comparable to those of certain hydrogels (34)) are also well in line with the high dextran permeability already described for low-matured membranes (4). Additionally, the observation of age-dependent variations in BM thickness further validate the use of MCF10A as a physiologically relevant model system given that, *in vivo*, the mammary duct BM is known to undergo significant alterations during the process of mammary gland morphogenesis. The formation of the ductal tree in fact involves a continuous reshaping of BMs, which can be as thin as 104 nm at the sites of ductal branching initiation (35) but reach up to 1.4  $\mu\text{m}$  in thickness (36) along the flanks of the terminal end buds.

Interestingly, previous work from some of the authors could show that the disruption of the collagen IV meshwork completely abolishes the size-dependent molecule retardation effect of fully developed BMs (4). This result is in full agreement with the notion emerging from confocal microscopy imaging, namely, that collagen IV acts as the main structural component of the protein network despite the estimated presence of over 50 different proteins in BMs (37).

In light of earlier work (38), our results on the collagen IV structure are surprising. Instead of forming a network with mesh sizes of  $\sim 50$  nm, as is well-documented from rapid-freeze, deep-etch replication experiments (6,39), the collagen network appears spatially heterogeneous, with denser areas that leave space for pores as large as 1  $\mu\text{m}$ . Although pores of 800 nm would be in line with the model for collagen IV assembly based on 7S and NC1 bonds originally proposed by Kühn (40), such structures have not been described elsewhere. One explanation for this discrepancy could be that the absence of a myoepithelial layer in the 3D cell culture model causes the absence of specific interactions necessary for the full formation of a physiological network (myoepithelial cells have been shown to secrete collagen IV and greatly help the structural arrangement of breast lobules (41)). On the other hand, it is well established that BMs of tissue in the human body requiring disintegrated

or massive remodeling (such as amniotic BMs) are significantly less cross-linked and hence more susceptible to proteolysis than other BMs (37). Given the extensive remodeling that breast glands undergo during puberty, pregnancy, and lactation, it is plausible that spatial collagen distribution and superstructure in the BM could be highly heterogeneous. Only comparison with super-resolution imaging of native breast BMs at different developmental stages could clarify this matter; however, such issues do not affect the validity of our poroelastic analysis, which is independent of the exact molecular architecture of the BM network.

In the future, it would be interesting to investigate the spatial localization of other prominent BM molecules as well, for instance, the network linkers nidogen and entactin. In this study, we focused on the non-network-forming laminin 3A32 isoform because of its high relevance for breast gland BMs. Uniform secretion of laminin-3A32, in fact, is a marker of correct MCF10A morphogenesis (42), and its loss a classic hallmark of breast carcinoma (43,44). Laminin-3A32 is also a fundamental coordinator of BM network structure thanks to its capacity to bind collagens and nidogen as well as the  $\alpha 6\beta 4$  and  $\alpha 3\beta 1$  integrins of breast gland epithelia (8).

The spatial colocalization of laminin and perlecan reported here is in line with previous findings (45); trimolecular complexes of laminin, perlecan, and dystroglycan, for instance, have already been described within cerebral cortex microvessels (46). In lung cells, a laminin-311-perlecan complex is necessary for mechanotransduction because it activates the MAPK pathway upon cyclic stretching (47). Given the high level of mechanical activity of epithelial breast gland cells, it will also be crucial to explore the mechanosensing role of laminins in this context.

### Poroelasticity and structure of breast gland BM at different scales

The AFM force-relaxation data reported offer a very strong indication that breast gland BMs mechanically behave as a poroelastic material. The excellent match of the FE simulations with the experimental relaxation curves allowed for the first quantification, to our knowledge, not only of BM stiffness but also of the diffusivity of water through the membranes. In essence, a poroelastic formulation allows us to describe the coupling of BM transport properties with matrix elasticity, information that would just be lost upon simplistically modeling the membranes as purely elastic objects, as often found in literature (14,15,18).

An important validation of the proposed mechanism came from comparing relaxation curves having different force peaks but measured with the same indenter. Parameters extracted by FE simulations and then used to predict the membrane relaxation at different initial forces described the experimental curves with excellent agreement. In particular, our results show that the relaxation curves for different

indentation depths can be fitted with a poroelastic model using the same value for the diffusivity  $D$ . Therefore, for a given indenter size, the characteristic time scales as  $a^2/D$ , where  $a$  is the contact radius depending on the indenter force (and hence on the indentation depth). A purely viscoelastic relaxation mechanism, on the other hand, would be independent of length scales (34,48) and could explain the slight underestimation of the force peak present in some cases (see Fig. S1), although this may also be due to tissue anisotropy (49). In conclusion, although we cannot exclude the additional presence of viscoelastic processes, the excellent agreement between numerical and experimental data supports the assumption that poroelasticity is the fundamental physical mechanism underpinning the force relaxation and the mechanical behavior of BMs.

A point of interest lies in the fact that the values of  $G$  and  $K$  obtained for the two indenter radii are shifted by a constant factor of  $\sim 3$ . Keeping in mind that part of this difference is certainly due to experimental uncertainty (each AFM cantilever, for instance, is subject to a certain calibration error), in general, such a trend should not surprise. The mechanical properties of microtissue are known to vary according to the scale analyzed: upon indenting cartilage samples with microspherical indenters, for instance, a 100-fold variation in their dynamic elastic modulus has been observed (50) as compared to that obtained using sharp pyramidal tips. Similar studies are reported for bone (51) and liver (52) samples, but the effect is expected to be ubiquitous for all types of tissue. Here, given that the smaller indenter radius ( $R = 0.5 \mu\text{m}$ ) is exactly comparable to the characteristic length of the collagen IV meshwork, we can understand why curves recorded with this cantilever gave higher stiffness values: when indenting with the  $3.5 \mu\text{m}$  bead, local heterogeneities at the nanoscale level are not resolved, and the chance of indenting exclusively on thick fiber bundles decreases.

Differences in the permeability of bone and cartilage tissue as assessed with nano- and microindentation tests have also been reported (53) and are typically due to the different microstructure of tissue at different scales. Here, the variation of the diffusivity with indenter size may be explained by the associated change in solvent pressure acting on the polymer matrix. Specifically, diffusivity should decrease with solvent pressure because of the collapse of collagen pores under compression (54). Consistent with this interpretation, we have found a sharp decrease in the fitted values of  $D$  as the maximal solvent pressure attained during each indentation test increases (see Fig. S2). Indeed, in collagen-based tissues, an exponential dependence of the permeability  $k$  (which is proportional to the diffusivity  $D$ ) on the volumetric strain is usually assumed (55). This implies that  $k$  strongly decreases with volume shrinkage as a consequence of the pressure acting on the matrix. From the relation  $D = \eta k R T / (\Omega \phi_0)$  (56), where  $\eta$  is the viscosity of water and  $\phi_0$  is its volume fraction in the membrane at

equilibrium, we can estimate the average permeability to be  $k \approx 6 \times 10^{-19} \text{ m}^2$ . This value corresponds to a pore size  $d \approx 4 \text{ nm}$ , assuming the relation  $k = d^2/32$  that holds for laminar flow through a cylindrical tube of diameter  $d$  (57). This estimate for  $d$  is in the same order of magnitude as values estimated in previous work (4).

Permeation in the breast is a highly physiological function. Even though BMs act as crucial gatekeepers for molecule diffusion and permeation, their porosity has so far received relatively little attention. A notable exception is given by kidney glomerular BMs, whose filtration properties have been studied for decades (58): their permeability barrier lies in the range of 40–200 kDa (3), and their protein architecture is characterized down to the nanoscale level (59). In the breast, the frequency and extent of milk removal from the lactating mammary gland determines the rate of further milk secretion thanks to the regulatory action of the feedback inhibitor of lactation protein, a 7.6 kDa whey polypeptide (60). Other hormones and signaling factors also need to normally cross the BM to perform their biological function during the different developmental stages, and even maternal dietary proteins of up to 43 kDa have been shown to permeate to the alveolar units of mammary glands to be passed to the infant via milk suckling (61). Hence, a better insight in the filtration properties of the BM would have significant implications for drug delivery. In previous experiments, we identified a permeation barrier for MCF10A BMs in the range of 40 kDa (4). Now, we interestingly observe that a polymer network behaving as a poroelastic material would also contribute to the breast gland flow properties by increasing the release of trapped fluid upon increased external pressure.

To estimate this effect, we performed a simulation in which a compressive load of 500 Pa with a periodicity of 1 Hz was applied to the BM along the thickness direction; such values have been associated with the rhythmic dynamic pressures experienced by breast glands during activities such as running (31) and become even higher during suckling and lactation (32,33). The corresponding relative volume variation experienced by the membrane reached a peak value of 22% (see Fig. S3). Given that intramammary pressures recorded in vivo during suckling are reported to be in the range of 2–6 kPa (32,33), the effective flow and hence transport of molecules in humans might be even higher than that estimated in our simulation. Even though calculations of specific proteins' fluxes are beyond the scope of this work, such substantial fluid exchange is most likely to influence the transport of all biomolecules throughout the BM.

The delivery of hormones such as prolactin to the milk-secreting inner layer of epithelial cells, therefore, is likely not only guided by free diffusion but could also be tuned in response to the varying tension and strain within tissue, which are especially high in the lactating breast. A confirmation of this mechanism comes from the theoretical

understanding that for other poroelastic materials, such as polymer gels, the stress-diffusion coupling indeed affects the kinetics of solvent diffusion within the polymer network (62).

## CONCLUSIONS

In this study, we analyzed the nanoscale topography of MCF-10A-derived breast gland BMs and assessed their mechanical properties by means of AFM nanoindentation. We found that the mechanical response of isolated BMs can be described in terms of a poroelastic material model, in line with the reported membrane's structural composition (i.e., a porous protein meshwork immersed in fluid). Additionally, we report differences in the permeability and mechanical properties of BMs at different scales of tissue architecture (namely, at the nano- and microscale) as already well established for ECM-rich tissues such as cartilage (53). Even at the model system level, our understanding of the complex interplay between ECM environment and breast gland regulation is still in its infancy, despite carrying profound implications for tissue development and cancer spreading. Serving both as mechanical scaffolds and as pressure-dependent reservoirs for various signaling molecules, BMs lie at a crucial interface linking the biochemical alterations known to accompany cancer development and progression with the biomechanical response of breast gland tissue. In the future, a more comprehensive study of BM properties variation with developmental stage and pathogenicity level would be of prime interest, although this would require the more complex analysis of tissue-isolated membranes. Future studies on the mechanics of BMs should also focus on their fracture properties and toughening mechanisms in relation to poroelasticity (63,64), as these may also have an impact on cancer spreading. Focusing on the initial analysis of in vitro secreted model systems, our data present the first detailed characterization to our knowledge of the architecture of breast gland BMs and, based on their structure, the identification of the fundamental mechanism describing material response (i.e., poroelasticity). Hopefully, this will offer a step forward toward a deeper understanding of breast gland tissue mechanoregulation.

## SUPPORTING MATERIAL

Supporting Materials and Methods, three figures, and one table are available at [http://www.biophysj.org/biophysj/supplemental/S0006-3495\(18\)31101-9](http://www.biophysj.org/biophysj/supplemental/S0006-3495(18)31101-9).

## AUTHOR CONTRIBUTIONS

G.F. performed research, analyzed data, and wrote the manuscript. A.L. performed research, analyzed data, and wrote the manuscript. N.H. performed research. E.N. performed research. B.H. performed research. A.D. designed research. R.M. designed research and wrote the manuscript.

## ACKNOWLEDGMENTS

We thank G. Dreissen (ICS-7) for the collagen filaments masking algorithm, F. Kumpfe (JPK) for precious technical support, F. Santoro (Istituto Italiano di Tecnologia) for helpful discussions on SEM imaging protocols, and the Helmholtz Nano Facility (65) for access and expert assistance.

A.D. and R.M. thank the Isaac Newton Institute for Mathematical Sciences for its hospitality during the program “Coupling geometric partial differential equations with physics for cell morphology, motility and pattern formation” (CGPW02) supported by Engineering and Physical Science Research Council grant no. EP/K032208/1. A.L. and A.D. acknowledge support from the European Research Council through AdG-340685 MicroMotility. This project has received funding from the European Union's Horizon 2020 research and innovation programme under the Marie Skłodowska-Curie grant agreement no. 642866 awarded to R.M. and B.H.

## SUPPORTING CITATIONS

References (66,67) appear in the [Supporting Material](#).

## REFERENCES

1. Alberts, B., A. Johnson, ..., P. Walter. 2014. *Molecular Biology of the Cell*. Garland Science, New York.
2. Rosso, F., A. Giordano, ..., A. Barbarisi. 2004. From cell-ECM interactions to tissue engineering. *J. Cell. Physiol.* 199:174–180.
3. Caulfield, J. P., and M. G. Farquhar. 1974. The permeability of glomerular capillaries to graded dextrans. Identification of the basement membrane as the primary filtration barrier. *J. Cell Biol.* 63:883–903.
4. Gaiko-Shcherbak, A., G. Fabris, ..., E. Noetzel. 2015. The acinar cage: basement membranes determine molecule exchange and mechanical stability of human breast cell acini. *PLoS One.* 10:e0145174.
5. Engvall, E. 1995. Structure and function of basement membranes. *Int. J. Dev. Biol.* 39:781–787.
6. Yurchenco, P. D., and G. C. Ruben. 1987. Basement membrane structure in situ: evidence for lateral associations in the type IV collagen network. *J. Cell Biol.* 105:2559–2568.
7. Quondamatteo, F. 2002. Assembly, stability and integrity of basement membranes in vivo. *Histochem. J.* 34:369–381.
8. Yurchenco, P. D. 2011. Basement membranes: cell scaffoldings and signaling platforms. *Cold Spring Harb. Perspect. Biol.* 3:a004911.
9. Bosman, F. T., M. Havenith, and J. P. Cleutjens. 1985. Basement membranes in cancer. *Ultrastruct. Pathol.* 8:291–304.
10. Kelley, L. C., L. L. Lohmer, ..., D. R. Sherwood. 2014. Traversing the basement membrane in vivo: a diversity of strategies. *J. Cell Biol.* 204:291–302.
11. Butcher, D. T., T. Alliston, and V. M. Weaver. 2009. A tense situation: forcing tumour progression. *Nat. Rev. Cancer.* 9:108–122.
12. Debnath, J., S. K. Muthuswamy, and J. S. Brugge. 2003. Morphogenesis and oncogenesis of MCF-10A mammary epithelial acini grown in three-dimensional basement membrane cultures. *Methods.* 30:256–268.
13. Liliensiek, S. J., P. Nealey, and C. J. Murphy. 2009. Characterization of endothelial basement membrane nanotopography in rhesus macaque as a guide for vessel tissue engineering. *Tissue Eng. Part A.* 15:2643–2651.
14. Candiello, J., G. J. Cole, and W. Halfter. 2010. Age-dependent changes in the structure, composition and biophysical properties of a human basement membrane. *Matrix Biol.* 29:402–410.
15. Candiello, J., M. Balasubramani, ..., H. Lin. 2007. Biomechanical properties of native basement membranes. *FEBS J.* 274:2897–2908.
16. Halfter, W., C. Monnier, ..., P. B. Henrich. 2013. The bi-functional organization of human basement membranes. *PLoS One.* 8:e67660.

17. Henrich, P. B., C. A. Monnier, ..., M. Loparic. 2012. Nanoscale topographic and biomechanical studies of the human internal limiting membrane. *Invest. Ophthalmol. Vis. Sci.* 53:2561–2570.
18. Last, J. A., S. J. Liliensiek, ..., C. J. Murphy. 2009. Determining the mechanical properties of human corneal basement membranes with atomic force microscopy. *J. Struct. Biol.* 167:19–24.
19. Hertz, H. 1881. Über die Berührung fester elastischer Körper. *J. Reine Angew. Math.* 92:156–171.
20. Zhu, D., Y. Fang, ..., X. Liu. 2017. Comparison of multi-mode parallel detection microscopy methods. *Opt. Commun.* 387:275–280.
21. Hutter, J., and J. Bechhoefer. 1993. Calibration of atomic force microscope tips. *Rev. Sci. Instrum.* 64:1868–1873.
22. Lucantonio, A., P. Nardinocchi, and L. Teresi. 2013. Transient analysis of swelling-induced large deformations in polymer gels. *J. Mech. Phys. Solids.* 61:205–218.
23. Flory, P., and J. Rehner. 1943. Statistical mechanics of cross-linked polymer networks I. Rubberlike elasticity. *J. Chem. Phys.* 11:512–520.
24. Flory, P., and J. Rehner. 1943. Statistical mechanics of cross-linked polymer networks II. Swelling. *J. Chem. Phys.* 11:521–526.
25. Lucantonio, A., and P. Nardinocchi. 2012. Reduced models of swelling-induced bending of gel bars. *Int. J. Solids Struct.* 49:1399–1405.
26. Powell, M. 2009. The BOBYQA Algorithm for Bound Constrained Optimization Without Derivatives, Technical Report. Department of Applied Mathematics and Theoretical Physics, Cambridge University, Cambridge, UK.
27. P. Fratzl, ed 2008. Collagen: Structure and Mechanics Springer Science+Business Media, Boston, MA.
28. Pozzi, A., P. D. Yurchenco, and R. V. Iozzo. 2017. The nature and biology of basement membranes. *Matrix Biol.* 57–58:1–11.
29. Oyen, M., A. Bembey, and A. Bushby. 2006. Poroelastic indentation analysis for hydrated biological tissues. *MRS Proceedings.* 975:0975–DD07–05.
30. Hu, Y., X. Zhao, ..., Z. Suo. 2010. Using indentation to characterize the poroelasticity of gels. *Appl. Phys. Lett.* 96:121904.
31. Lu, M., Q. Jiangyuan, ..., D. Xiaoqun. 2016. Mechanical analysis of breast-bra interaction for sports bra design. *J. Materials Today Communications.* 6:28–36.
32. Ellendorff, F., and D. Schams. 1988. Characteristics of milk ejection, associated intramammary pressure changes and oxytocin release in the mare. *J. Endocrinol.* 119:219–227.
33. Kent, J. C., L. M. Kennaugh, and P. E. Hartmann. 2003. Intramammary pressure in the lactating sow in response to oxytocin and during natural milk ejections throughout lactation. *J. Dairy Res.* 70:131–138.
34. Hu, Y., E. Chan, ..., Z. Suo. 2011. Poroelastic relaxation indentation of thin layers of gels. *J. Appl. Phys.* 110:086103.
35. Wiseman, B. S., M. D. Sternlicht, ..., Z. Werb. 2003. Site-specific inductive and inhibitory activities of MMP-2 and MMP-3 orchestrate mammary gland branching morphogenesis. *J. Cell Biol.* 162:1123–1133.
36. Fata, J. E., Z. Werb, and M. J. Bissell. 2004. Regulation of mammary gland branching morphogenesis by the extracellular matrix and its remodeling enzymes. *Breast Cancer Res.* 6:1–11.
37. Kalluri, R. 2003. Basement membranes: structure, assembly and role in tumour angiogenesis. *Nat. Rev. Cancer.* 3:422–433.
38. Yurchenco, P. D., and G. C. Ruben. 1988. Type IV collagen lateral associations in the EHS tumor matrix. Comparison with amniotic and in vitro networks. *Am. J. Pathol.* 132:278–291.
39. Barnard, K., S. A. Burgess, ..., D. M. Woolley. 1992. Three-dimensional structure of type IV collagen in the mammalian lens capsule. *J. Struct. Biol.* 108:6–13.
40. Timpl, R., H. Wiedemann, ..., K. Kühn. 1981. A network model for the organization of type IV collagen molecules in basement membranes. *Eur. J. Biochem.* 120:203–211.
41. Adriance, M. C., J. L. Inman, ..., M. J. Bissell. 2005. Myoepithelial cells: good fences make good neighbors. *Breast Cancer Res.* 7:190–197.
42. Wang, H., S. Lacoche, ..., S. K. Muthuswamy. 2013. Rotational motion during three-dimensional morphogenesis of mammary epithelial acini relates to laminin matrix assembly. *Proc. Natl. Acad. Sci. USA.* 110:163–168.
43. Miyazaki, K. 2006. Laminin-5 (laminin-332): Unique biological activity and role in tumor growth and invasion. *Cancer Sci.* 97:91–98.
44. Kwon, S. Y., S. W. Chae, ..., M. Philip. 2012. Laminin 332 expression in breast carcinoma. *Appl. Immunohistochem. Mol. Morphol.* 20:159–164.
45. Henry, M. D., J. S. Satz, ..., K. P. Campbell. 2001. Distinct roles for dystroglycan,  $\beta 1$  integrin and perlecan in cell surface laminin organization. *J. Cell Sci.* 114:1137–1144.
46. Kanagawa, M., D. E. Michele, ..., K. P. Campbell. 2005. Disruption of perlecan binding and matrix assembly by post-translational or genetic disruption of dystroglycan function. *FEBS Lett.* 579:4792–4796.
47. Jones, J. C., K. Lane, ..., S. Budinger. 2005. Laminin-6 assembles into multimolecular fibrillar complexes with perlecan and participates in mechanical-signal transduction via a dystroglycan-dependent, integrin-independent mechanism. *J. Cell Sci.* 118:2557–2566.
48. Kalciglu, Z., R. Mahmoodian, ..., K. Van Vliet. 2012. From macro- to microscale poroelastic characterization of polymeric hydrogels via indentation. *Soft Matter.* 8:3393–3398.
49. Hatami-Marbini, H., and R. Maulik. 2016. A biphasic transversely isotropic poroviscoelastic model for the unconfined compression of hydrated soft tissue. *J. Biomech. Eng.* 138:4032059.
50. Stolz, M., R. Raiteri, ..., U. Aebi. 2004. Dynamic elastic modulus of porcine articular cartilage determined at two different levels of tissue organization by indentation-type atomic force microscopy. *Biophys. J.* 86:3269–3283.
51. Rho, J. Y., L. Kuhn-Spearing, and P. Zioupos. 1998. Mechanical properties and the hierarchical structure of bone. *Med. Eng. Phys.* 20:92–102.
52. Evans, D. W., E. C. Moran, ..., J. L. Sparks. 2013. Scale-dependent mechanical properties of native and decellularized liver tissue. *Biomech. Model. Mechanobiol.* 12:569–580.
53. Oyen, M., T. Shean, ..., M. Galli. 2012. Size effects in indentation of hydrated biological tissues. *J. Mater. Res.* 27:245–255.
54. Chandran, P. L., and V. H. Barocas. 2004. Microstructural mechanics of collagen gels in confined compression: poroelasticity, viscoelasticity, and collapse. *J. Biomech. Eng.* 126:152–166.
55. Ateshian, G. A., W. H. Warden, ..., V. C. Mow. 1997. Finite deformation biphasic material properties of bovine articular cartilage from confined compression experiments. *J. Biomech.* 30:1157–1164.
56. Yasuda, H., C. Lamaze, and A. Peterlin. 1971. Diffusive and hydraulic permeabilities of water in water-swollen polymer membranes. *J. Polym. Sci. A-2. Polym. Phys.* 9:1117–1131.
57. Landau, L., and E. Lifshitz. 1987. Fluid Mechanics, Second Edition. Pergamon Press, Oxford, UK.
58. Lawrence, M. G., M. K. Altenburg, ..., O. Smithies. 2017. Permeation of macromolecules into the renal glomerular basement membrane and capture by the tubules. *Proc. Natl. Acad. Sci. USA.* 114:2958–2963.
59. Suleiman, H., L. Zhang, ..., A. Dani. 2013. Nanoscale protein architecture of the kidney glomerular basement membrane. *eLife.* 2:e01149.
60. Wilde, C. J., C. V. Addey, ..., M. Peaker. 1995. Autocrine regulation of milk secretion by a protein in milk. *Biochem. J.* 305:51–58.
61. Kilshaw, P. J., and A. J. Cant. 1984. The passage of maternal dietary proteins into human breast milk. *Int. Arch. Allergy Appl. Immunol.* 75:8–15.
62. Lucantonio, A., P. Nardinocchi, and H. Stone. 2014. Swelling dynamics of a thin elastomeric sheet under uniaxial pre-stretch. *J. Appl. Phys.* 115:083505.

63. Lucantonio, A., G. Noselli, ..., M. Arroyo. 2015. Hydraulic fracture and toughening of a brittle layer bonded to a hydrogel. *Phys. Rev. Lett.* 115:188105.
64. Noselli, G., A. Lucantonio, ..., A. DeSimone. 2016. Poroelastic toughening in polymer gels: a theoretical and numerical study. *J. Mech. Phys. Solids.* 94:33–46.
65. Albrecht, W., J. Moers, and B. Hermanns. 2017. HNF - Helmholtz Nano Facility. *J. Large-Scale Research Facilities.* 3:A122.
66. Doi, M. 2009. Gel dynamics. *J. Phys. Soc. Jpn.* 78:052001.
67. COMSOL Inc. COMSOL multiphysics reference manual. Version 5.2a, COMSOL Inc., [www.comsol.com](http://www.comsol.com).

**Biophysical Journal, Volume 115**

**Supplemental Information**

**Nanoscale Topography and Poroelastic Properties of Model Tissue  
Breast Gland Basement Membranes**

**Gloria Fabris, Alessandro Lucantonio, Nico Hampe, Erik Noetzel, Bernd Hoffmann, Antonio DeSimone, and Rudolf Merkel**

# SUPPORTING MATERIAL

## Nanoscale topography and poroelastic properties of model tissue breast gland basement membranes

G. Fabris<sup>1,3</sup>, A. Lucantonio<sup>2</sup>, N. Hampe<sup>1</sup>, E. Noetzel<sup>1</sup>, B. Hoffmann<sup>1</sup>, A. DeSimone<sup>2</sup>, and R. Merkel<sup>1,\*</sup>

<sup>1</sup>Institute of Complex Systems, ICS-7: Biomechanics, Forschungszentrum Jülich, Jülich, Germany

<sup>2</sup>International School for Advanced Studies - SISSA, Trieste, Italy

<sup>3</sup>Dept. of Mechanical Engineering, Stevens Institute of Technology, Hoboken, NJ, USA

\*Correspondence: r.merkel@fz-juelich.de

### 1 COMPUTATIONAL MODEL OF THE MEMBRANE INDENTATION

We model the basement membrane as a polymer-based, non-linear poroelastic material that we describe using the theory for swelling gels developed in (1). In the following, we briefly summarize the governing equations, along with the boundary conditions and the numerical formulation of the model.

#### 1.1 Governing equations and boundary conditions

The displacement of the membrane's polymer network with respect to a reference configuration  $\mathcal{B}$  is described by the vector field  $\mathbf{u}$ . This field describes the state of the membrane together with the solvent concentration  $c$  per unit reference volume. The solvent within the membrane (in this case, water) is additionally characterized by a chemical potential  $\mu$ , which quantifies the energy it carries. The driving force of solvent migration is given by the gradient of the chemical potential. The corresponding solvent molar flux  $\mathbf{h}$  (units  $\text{mol}/\text{m}^2 \cdot \text{s}$ ) characterizes the relative motion of the solvent with respect to the polymer matrix. We will use the symbol  $\mathbf{F} = \mathbf{I} + \nabla \mathbf{u}$  (with  $\mathbf{I}$  the identity) for the deformation gradient and write  $J = \det \mathbf{F}$  for its determinant, and  $\mathbf{F}^* = J\mathbf{F}^{-T}$  for its cofactor.

Swelling processes are governed by the equations of balance of forces and moments that, assuming inertia negligible, read:

$$\operatorname{div} \mathbf{S} = 0, \quad \operatorname{skw} \mathbf{S}\mathbf{F}^T = 0, \quad (1)$$

where  $\mathbf{S}$  denotes the first Piola-Kirchhoff stress tensor, and by the balance of solvent mass:

$$\dot{c} = -\operatorname{div} \mathbf{h}, \quad (2)$$

subject to the initial condition  $c = c_0$ . Here,  $c_0 = (J_0 - 1)/(\Omega J_0)$  is the solvent concentration per unit reference volume initially present within the membrane in its equilibrium state, with  $J_0$  the volume ratio between the reference and the dry configuration and  $\Omega$  the solvent molar volume. The coupling between Eqs. 1-2 occurs both at the kinematic and at the constitutive levels.

From the viewpoint of kinematic coupling, the polymer matrix and the solvent are considered to be separately incompressible; hence, the change in volume of the membrane is related to the change in solvent concentration:

$$J = 1 + \Omega(c - c_0). \quad (3)$$

This constraint is enforced through the Lagrange multiplier  $p$ .

As concerns the constitutive equations, we prescribe the following Flory-Rehner representation for the free energy density of the membrane (1, 2):

$$\psi(\mathbf{F}, c) = \psi_e(\mathbf{F}) + \psi_m(c), \quad (4)$$

where

$$\psi_e(\mathbf{F}) = \frac{G_d}{2J_0}(J_0^{1/3}\mathbf{F} \cdot \mathbf{F} - 3) \quad \text{and} \quad \psi_m(c) = \mathcal{R}Tc \left[ \log \left( \frac{\Omega J_0 c}{1 + \Omega J_0 c} \right) + \chi \frac{1}{1 + \Omega J_0 c} \right] \quad (5)$$

are the neo-Hookean elastic energy of the polymer network and the Flory-Huggins free energy of solvent-polymer mixing, respectively. Here,  $G_d$  is the shear modulus of the dry polymer,  $\mathcal{R}$  is the universal gas constant,  $T$  is the absolute temperature of

the environment, and  $\chi$  is the polymer-solvent mixing parameter. For the consistency with thermodynamical principles, the corresponding constitutive equations are given by:

$$\mathbf{S} = \frac{\partial \psi_c}{\partial \mathbf{F}} - p \mathbf{F}^* , \quad \mu = \frac{\partial \psi_m}{\partial c} + \Omega p , \quad \mathbf{h} = -\frac{c D}{\mathcal{R}T} \nabla \mu , \quad (6)$$

where  $D$  is the diffusivity of the solvent within the membrane. Here, we have chosen a Darcy-like law to relate the water flux to the gradient of chemical potential. The value of the model parameters used in the simulations are reported in Table S1.

In the reference configuration, because of the chemical equilibrium, the membrane's chemical potential  $\mu_o$  is homogeneous and equals that of the external solvent. Specifically, we consider an external solvent in equilibrium with its vapor, so that  $\mu_o = \mu_e = 0$  J/mol. Moreover, the reference configuration is stress-free, hence it is identified by the conditions  $\mathbf{F} = \mathbf{I}$ ,  $\mu = \mu_o$  and  $\mathbf{S} = 0$ , which together determine the swelling ratio  $J_o$  as the solution of the equation:

$$\log \left( 1 - \frac{1}{J_o} \right) + \frac{1}{J_o} + \frac{\chi}{J_o^2} + \frac{G_d \Omega}{\mathcal{R}T} \frac{1}{J_o^{1/3}} = 0 , \quad (7)$$

which coincides with Eq. 6 of the main text upon introducing the initial water volume fraction  $\phi_o = 1 - 1/J_o$ . As fitting parameters for model calibration, we choose  $\lambda_o$ ,  $\chi$  and  $D$ . In particular, once  $\lambda_o$  and  $\chi$  are known, the incremental shear modulus  $G = G_d/J_o^{1/3}$  with respect to the reference configuration can be readily computed from:

$$G = -\frac{\mathcal{R}T}{\Omega} \left[ \log \phi_o + 1 - \phi_o + \chi(1 - \phi_o)^2 \right] , \quad (8)$$

while the incremental bulk modulus  $K$  obtained by linearizing the constitutive equations is (3):

$$K = -\frac{G}{3} + \frac{\mathcal{R}T}{\Omega} \left( \frac{1}{\phi_o} - 2\chi \right) (1 - \phi_o)^2 . \quad (9)$$

For symmetry reasons, 1/4 of the membrane was chosen as the computational domain (see Fig. 6b in the main text); the corresponding zero normal displacement and zero normal solvent-flux boundary conditions were imposed on the symmetry planes. The substrate was assumed to be rigid, frictionless, and impermeable, which amounts to prescribing zero normal displacement and zero normal solvent flux on the bottom surface of the membrane. Apart from the boundaries in contact with the substrate and the indenter, the free surface of the membrane was assumed to be in chemical equilibrium with the surrounding water bath at all times, *i.e.*  $\mu = \mu_e$ .

The indentation procedure was modeled as follows. Starting from the equilibrium state of free swelling with  $\mu = \mu_o$ , the indenter was vertically displaced at constant speed  $v = 50 \mu\text{m/s}$  and brought into contact with the membrane, until the indentation depth  $\delta$  as measured experimentally was reached. The indenter was modeled as a rigid body. A penalty formulation was employed to describe frictionless contact between the membrane and the spherical indenter, *i.e.* the normal contact pressure  $p_c = -kd$  for  $d \leq 0$  ( $p_c = 0$  for  $d > 0$ ) was applied on the contact region  $\mathcal{S}_c$  of the membrane surface, with  $k$  the penalty factor and  $d$  the distance between the surface of the indenter and the top surface of the membrane.

## 1.2 Weak form of the governing equations and numerical procedures

In order to solve the problem set in the previous paragraphs by means of the finite element method, we recast the governing equations 1, 2, and 3 in weak form. Then, the weak formulation of the problem reads: find  $\mathbf{u}$ ,  $c$ ,  $p$  and  $g$  such that the following equations

$$\int_{\mathcal{B}} \mathbf{S} \cdot \nabla \tilde{\mathbf{u}} = \int_{\mathcal{S}_c} \mathbf{s} \cdot \tilde{\mathbf{u}} , \quad \int_{\mathcal{B}} (-c \tilde{\mu} + \mathbf{h} \cdot \nabla \tilde{\mu}) - \int_{\mathcal{S}_f} (g \tilde{\mu}) = 0 , \quad (10)$$

$$\int_{\mathcal{B}} (J - 1 - \Omega c + \Omega c_o) \tilde{p} = 0 , \quad \int_{\mathcal{S}_f} (\mu(c, p) - \mu_e) \tilde{g} = 0 , \quad (11)$$

hold for arbitrary test fields (indicated with a superposed tilde) compatible with the Dirichlet boundary conditions. Here,  $\mathbf{s} = -p_c \mathbf{n}$  is the contact traction, with  $\mathbf{n}$  the outward unit normal to the *current* contact surface  $\mathcal{S}_c$ , and  $g$  is the Lagrange multiplier enforcing the chemical equilibrium on the free surface  $\mathcal{S}_f$  of the membrane. The weak form of the governing equations is complemented by the constitutive relations 6. Equations 10-11 and the corresponding boundary conditions were implemented



Table S1: Parameter values used in the numerical simulations.

| <i>Parameter</i> | <i>Value</i>                                                  | <i>Description</i>                       |
|------------------|---------------------------------------------------------------|------------------------------------------|
| $h$              | $(160 - 450) \text{ nm}^{\text{a}}$                           | Membrane thickness                       |
| $L$              | $100h$                                                        | Membrane in-plane length                 |
| $\lambda_0$      | $4.2 - 5^{\text{b}}$                                          | Initial swelling stretch of the membrane |
| $\chi$           | $0.42 - 0.48^{\text{b}}$                                      | Solvent-polymer mixing parameter         |
| $D$              | $(0.01 - 1.5) \times 10^{-7} \text{ m}^2/\text{s}^{\text{b}}$ | Solvent diffusivity                      |
| $\Omega$         | $1.8 \times 10^{-5} \text{ m}^3/\text{mol}$                   | Solvent molar volume                     |
| $T$              | 298 K                                                         | Ambient temperature                      |
| $r$              | $0.5, 3.5 \mu\text{m}$                                        | Indenter radius                          |
| $v$              | $50 \mu\text{m}/\text{s}$                                     | Indentation speed                        |
| $\delta$         | $(90 - 180) \text{ nm}^{\text{a}}$                            | Indentation depth                        |

a. Variable. Value selected according to experiment.

b. Fitting parameter.

into the finite element software COMSOL Multiphysics v5.2a using the Weak Form PDE mode (see (4) for details regarding the solvers). Specifically, quadratic shape functions were used for  $\mathbf{u}$ ,  $c$  and  $g$ , while the pressure field  $p$  was discretized using linear shape functions to get a reliable approximation of the volume constraint. The implicit, variable-order (from 1 to 5), adaptive step-size BDF solver was used for time-stepping. A quasi-Newton algorithm was employed to solve iteratively the non-linear algebraic system resulting from the finite element discretization at each time step. The direct solver MUMPS was chosen for the solution of the linearized algebraic system at each iteration. The mesh consisted of triangular elements for the surface of the indenter, and of prism and hexahedra for the membrane, corresponding to a total of about  $4 \times 10^4$  degrees of freedom. Local mesh refinement over the contact area between the indenter and the membrane was performed to ensure convergence and accuracy of the solution.

For given values of the model parameters, the solution of equations 10-11 allows to evaluate the indentation force, *i.e.* the integral of the contact traction over  $\mathcal{S}_c$ , as a function of time. This was then compared with the experiments to calibrate the model parameters  $\lambda_0$ ,  $D$  and  $\chi$ . In particular, a least-square fitting procedure was employed for such a calibration. The cost functional, *i.e.* the squared distance between the numerical and experimental force-time curves, exhibits several local minima, which correspond to different sets of optimal fitting parameters. To ensure that the global minimizer was found in the optimization procedure, after a preliminary sampling of the parameter space, the range of the fitting parameters was restricted, and the optimization was performed multiple times starting from 100 randomly generated points within such range. In each optimization run, the gradient-free BOBYQA optimization algorithm was employed to perform the least-square fitting. After completing the optimization runs, the minimizer corresponding to the lowest value of the cost function was selected.

## 2 FORCE-RELAXATION CURVES: COMPARISON BETWEEN EXPERIMENTAL DATA AND NUMERICAL RESULTS

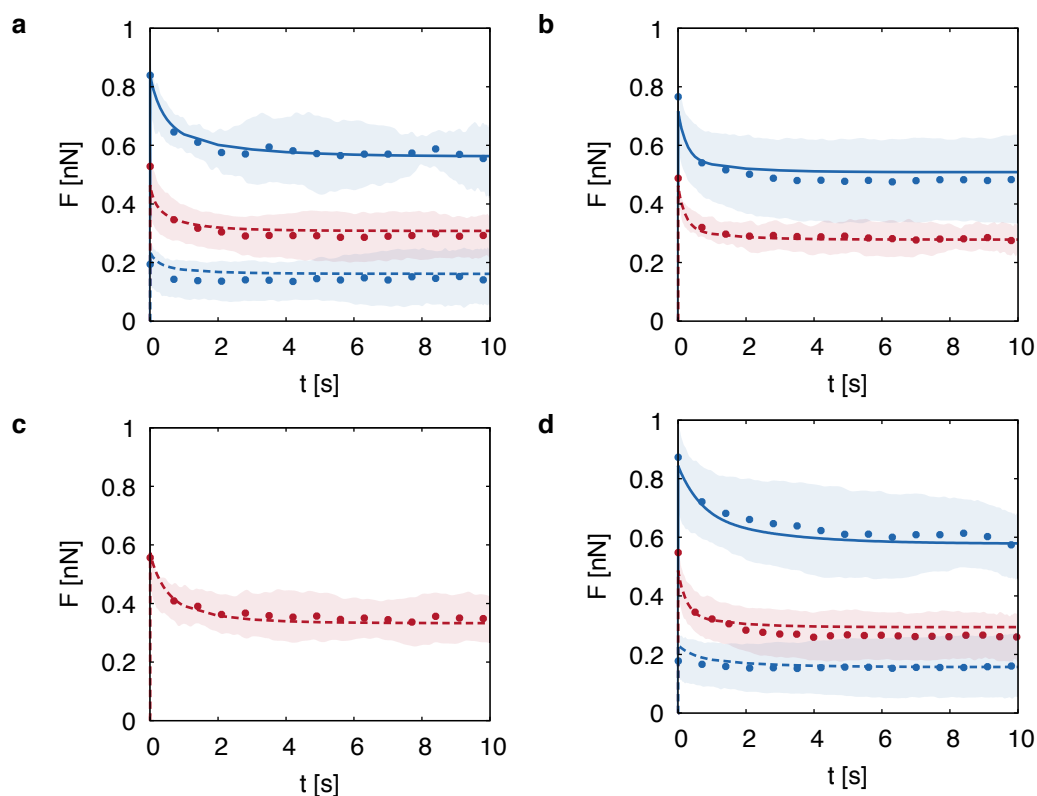

Figure S1: Force-relaxation curves: comparison between experimental (dots) and numerical (lines) results for four different membranes (a-d) and for different values of both indenter radius  $R$ :  $3.5\ \mu\text{m}$  (blue),  $0.5\ \mu\text{m}$  (red), and force setpoint  $F$ :  $1\ \text{nN}$  (solid lines),  $0.5\ \text{nN}$  (dashed lines). Dots and shaded areas correspond to the spatial averages and the standard deviations of the indentation force, respectively, as computed from experimental data.

## 3 EFFECT OF WATER PRESSURE ON MEMBRANE PERMEABILITY

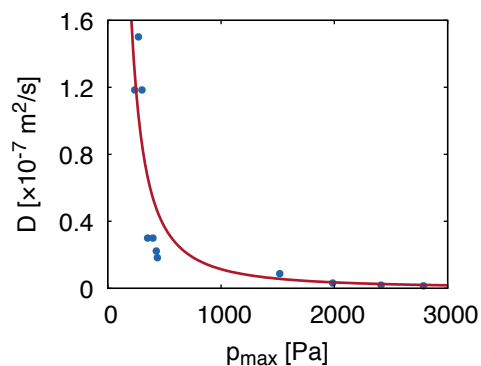

Figure S2: Water diffusivity as a function of the maximum water pressure in the membrane recorded during each indentation test. Dots represent data from numerical simulations. The red line is a power-law fit to the data:  $0.0013 \cdot p_{\text{max}}^{-1.686}$ .

## 4 EFFECT OF OSCILLATING COMPRESSIVE BODY LOAD ON SOLVENT FLUX AND MEMBRANE VOLUME

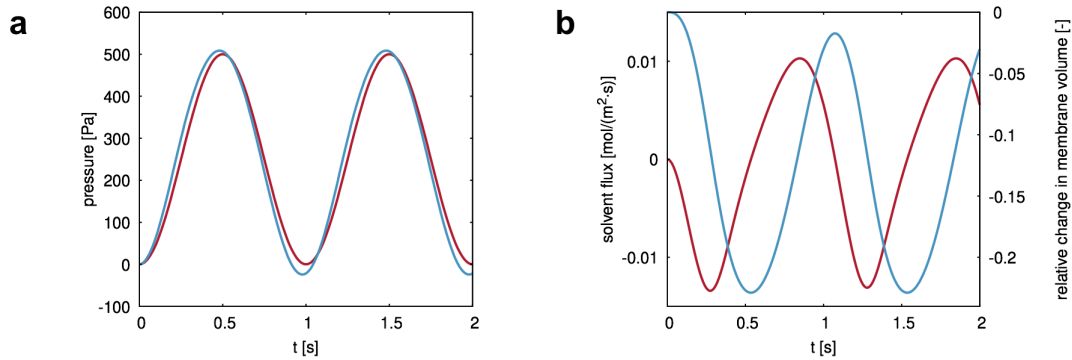

Figure S3: (a) Solvent pressure within (red curve) and outside (blue curve) the membrane. (b) Surface-averaged solvent flux (red curve, negative values meaning outward flux) computed on the boundary of the membrane in contact with the external solvent. Relative volume change of the membrane (blue curve):  $\int_{\mathcal{B}} \Omega(c - c_o) dV / \int_{\mathcal{B}} dV$

In this simulation, a membrane with thickness  $L = 300$  nm is subject to an oscillating compressive body load  $-(p_e(t)/L)\mathbf{e}_3$ ,  $p_e(t) = p_{\max}/2[1 - \cos(2\pi ft)]$ , in the direction  $\mathbf{e}_3$  of the thickness, with peak pressure magnitude  $p_{\max} = 500$  Pa and frequency  $f = 1$  Hz. This body load mimics inertia loads associated to suckling during lactation (5, 6). The geometry and boundary conditions are taken as for indentation simulations (except for the contact with the indenter, which is here absent); the other model parameters are chosen as  $\lambda_o = 4.6$ ,  $\chi = 0.488$ ,  $D = 7.5 \times 10^{-8} \text{ m}^2/\text{s}$ , which correspond to a typical membrane in our indentation experiments. The external fluid pressure (red curve in Fig. S3a) is supposed to vary according to  $p_e$ , so that applied traction on the top surface of the membrane is  $-p_e\mathbf{e}_3$  and the external chemical potential is  $\mu_e = \Omega p_e$ . As reported in Fig. S3a, the volume-averaged fluid pressure  $\mu/\Omega$  within the membrane (blue curve) closely follows the time course of the external pressure, with a slightly different period due to the non-equilibrium in solvent transport and a greater amplitude, which drives solvent exchange with the exterior. Such an exchange may be quantified by evaluating the surface-averaged solvent flux (Fig. S3b, red curve, negative values meaning outward flux), which reaches a peak absolute value of  $1 \times 10^{-2} \text{ mol/m}^2 \cdot \text{s}$ . In particular, in the first half of a period (approximately) the membrane expels fluid due to the overpressure developing as a consequence of the compressive body load; the expelled fluid is then mostly regained in the second half of the period, when the average inner pressure is lower than the external pressure. The relative volume change of the membrane, *i.e.*, the ratio between the volume of fluid exchanged with the exterior and the initial volume of the membrane, is depicted in Fig. S3b (blue curve) and reaches a maximum of 22%.

### SUPPORTING REFERENCES

1. Lucantonio A., P. Nardinocchi, and L. Teresi. 2013. Transient analysis of swelling-induced large deformations in polymer gels, *J. Mech. Phys. Solids* 61:205–218.
2. Doi M. 2009. Gel dynamics, *J. Phys. Soc. Jpn.* 78(5), 052,001
3. Lucantonio A., and P. Nardinocchi. 2012. Reduced models of swelling-induced bending of gel bars, *Int. J. Solids Struct.* 49:1399–1405.
4. COMSOL Multiphysics Reference Manual, version 5.2a, COMSOL Inc., URL [www.comsol.com](http://www.comsol.com)
5. Ellendorff F., and D. Schams. 1998. Characteristics of milk ejection, associated intramammary pressure changes and oxytocin release in the mare, *J. Endocr.* 119 219–227
6. Kent J., L. Kennaugh, and P.E. Hartmann. 2003. Intramammary pressure in the lactating sow in response to oxytocin and during natural milk ejections throughout lactation, *J. Dairy Res.* 70:131–138.
